# Supplementary material
Source: PubMed Central journal article supplement (PMC2176104)
Supplement: ajrccm_176_12_1192__1.pdf [file ajrccm_176_12_1192__1.pdf]

**Online Data Supplement**

**Transforming Growth Factor- $\beta$ 1 C-509T Polymorphism, Oxidant Stress, and Early Onset  
Childhood Asthma**

Muhammad T. Salam, W. James Gauderman, Rob McConnell,

Pi-Chu Lin, Frank D. Gilliland

## **METHODS**

### ***Study design and subjects***

Children of this study participated in the CHS, which has been described previously (E1, E2). In brief, a total of 6,259 children attending public school in 12 southern California communities were recruited in two cohorts in 1993 and 1996 for the CHS. Mean age at enrollment was 12.1 years (standard deviation (SD) 2.4 years) for cohorts recruited in 1993 and was 9.6 years (SD, 0.4 years) for cohort recruited in 1996. Beginning in 1998, we started collecting buccal samples and by May 2006, we collected and genotyped samples from 3,825 (61.1%) of children. Parents provided informed consent for participants below 18 years of age whereas participants over 18 years of age gave their informed consent. Children who were African-American (n = 163), Asian (n = 166) or belonged mixed race/ethnicity (n = 192) were excluded from the analysis due to insufficient sample sizes for stratified analyses and concern for population stratification. We also excluded 28 children for whom we did not have race/ethnicity information. Sixty-two children with unknown asthma status and 61 children with early transient wheezing were also excluded.

Of the 3,153 non-Hispanic and Hispanic white children with available buccal samples, we were unable to obtain genotype results for the two SNPs in the TGF $\beta$ 1 gene for 130 (4.1%) children. Therefore, our final sample included 3,023 children who were either Hispanic (n = 927) or non-Hispanic (n = 2,096) white with known asthma status and not with early transient wheezing. The University of Southern California Institutional Review Board approved the study.

### ***Exposure assessment***

Residential distance from nearest freeway was assigned to each child based on his/her residence at study entry. Residence addresses were standardized and their locations geocoded by use of the TeleAtlas database and software (Tele Atlas Inc., Menlo Park, CA, USA, <http://www.na.teleatlas.com>). We used ERSI ArcGIS version 8.3 (ESRI, Redland, CA, USA, <http://www.esri.com>) software to calculate the distance from each residence to the nearest freeway, defined as an interstate freeway, US highway, or restricted-access high-way, and to the nearest major non-freeway road, which included other types of highways and large roads.

Distance to the nearest major road (m) from each child's home was calculated with the ArcGIS 9.1 NEAR function (Redlands, California, USA). We defined road size using the TeleAtlas Geographic Data Technology (Boston, Massachusetts, USA) feature class codes (FCC) and labeled roads with an FCC code in groups A1, A2, and A3 as major roads. These codes represented primary highways with limited access, primary roads without limited access, and secondary and connecting roads, respectively. Lower classifications (A4 through A7) covered local roads, neighborhood road, rural roads, vehicular trails, roads with special characteristics, and other thoroughfares.

To estimate vehicle counts near homes, annual average daily traffic volumes were obtained from the California Department of Transportation (CALTRANS) Highway Performance Monitoring System for the year 2000. The traffic volumes were transferred from the CALTRANS roadway network to the TeleAtlas networks using previously described methods (E3). The hourly traffic volumes on weekdays and weekend days were estimated from the annual average daily traffic

volumes and the average diurnal and day-of-week freeway and non-freeway traffic variations observed in Southern California. These data were used to calculate the daily average number of vehicles traveling within 150 meters of each residence, weighted by inverse distance from the home to each road. This local traffic density was expressed as traffic volume per square meter.

### ***Buccal Cell Collection and Processing***

Children were provided with two toothbrushes and instructed to brush their teeth with the first one. They were instructed to gently brush the buccal mucosa with the second toothbrush. The brush was then placed in a leak proof container that was filled with an alcohol-based fixative. Children then swished liquid throughout their mouths and expelled the fluid into a container. The majority of buccal cell specimens were collected at school under the supervision of study staff. The remaining specimens were collected at home and sent to us by mail.

Buccal cell suspensions were centrifuged at 2,000g on the day they were received in the laboratory. The pellets were stored frozen at  $-20^{\circ}\text{C}$  until used for DNA extraction, at which time they were resuspended and incubated in 600  $\mu\text{l}$  of lysis solution from a PUREGENE DNA isolation kit (cat #D-5000; GENTRA, Minneapolis, MN) containing 100  $\mu\text{g/ml}$  proteinase K overnight at  $55^{\circ}\text{C}$ . DNA extraction was performed according to manufacturer's recommendations. The DNA samples were resuspended in aqueous solution and stored at  $-20^{\circ}\text{C}$ .

### ***Determination of haplotype block structure***

We determined the haplotype block structure of the  $\text{TGF}\beta 1$  gene in non-Hispanic and Hispanic whites using genotyping data on subjects from the Multiethnic Cohort (MEC) (E4) who were representative of the racial/ethnic groups included in the present study. We used 15 SNPs that

were in Hardy-Weinberg equilibrium for identifying the common haplotypes in 66 non-Hispanic Whites and 65 Latinos (Hispanic whites) using the software Haploview (version 3.3, available at <http://www.broad.mit.edu/mpg/haploview/index.php>). We excluded SNPs from determining haplotypes if the minor allele frequency was less than 1%. In order to have a complete coverage of the TGF $\beta$ 1 gene including its 5' and 3' untranslated regions (UTRs), 3 SNPs (ie, rs2241714, rs11666933, and rs4803457) that were located upstream to the TGF $\beta$ 1 promoter region were genotyped. These SNPs were in the MGC4093 gene, which encodes for hypothetical protein LOC80776. In the 3' UTR region, 2 SNPs (ie, rs2241718 and rs3810173) that were in the MGC20255 gene were genotyped. This gene encodes for hypothetical protein LOC90324. Haplotype block structure was defined using Gabriel's criteria (E5).

### ***Genotyping***

Genomic DNA was extracted from buccal mucosal cells by using PUREGENE<sup>TM</sup> DNA purification kit (Gentra Systems, Minneapolis, MN). Samples were analyzed in ABI prism 7700 Sequence Detector (Applied BioSystems, Foster City, CA) using Applied Biosystems-Sequence Detection Systems 1.9.1 software to discriminate allelic genotypes. Each reaction contained genomic DNA, QuantiTect probe (Qiagen, Valencia, CA), both forward and reverse primers (designed using ABI Primer Express software, Applied BioSystems), and a minor groove binding (MGB) probe for each allele.

The DNA fragment containing the SNP C-509T of the TGF $\beta$ 1 gene was amplified using forward (5'-GCTCAGTAAAGGAGAGCAATTCTTACA-3') and reverse

(5'-GGTAGGAGAAGGAGGGTCTGTCA-3') primers. TaqMan MGB probe for C and T alleles were labeled with reporter dyes FAM (5'-CCATCCCTCAGGTGT-3') and VIC (5'-TTCCATCCTTCAGGTGT-3'), respectively.

The DNA fragment containing the SNP rs4803457 of the TGF $\beta$ 1 gene in the 5' flanking region was first amplified by using forward (5'-GCAGCCAAAGTGATCTTTCC-3') and reverse (5'-CTGCCATCCATGTTTCATGTC-3') primers, and the PCRs were run for 35 cycles in the following manner: 95°C for 1 minute, 56°C for 1 minute and 72°C for 2 minute. The first-step PCR products were used as templates for the TaqMan PCR, which was amplified using forward (5'-GGTAACCATCATGGGCCTTGTC-3') and reverse (5'-GGCAAAGCTATGGAAGGAGAG-3') primers. TaqMan MGB probe for C and T alleles were labeled with FAM (5'-CTGCTCCCTTTGGG-3') and VIC (5'-CTGCTCTCTTTGGGC-3'), respectively. The main cycling parameters of TaqMan PCR included: 50 °C for 2 min, 95 °C for 10 min, 35 cycles of 92°C for 15 s and 60°C for 1 min.

Each SNP assay was validated in selected samples using a second genotyping method, either the Automatic Sequencing (BigDye version 3.1, 377XL DNA sequencer) or digestion with an allele-specific restriction endonuclease followed by electrophoresis on agarose gels (RFLP).

Genotyping was done in plates with 81 samples per batch with 10% of repeat samples within each plate. To minimize error between plates, inter-batch control samples were also placed. In the presence of intra- or inter-plate genotype discrepancy, the entire plate was re-genotyped. If genotype discrepancy could not be resolved, then we labeled the result as “unavailable” and removed the subject from data analyses.

**TABLE E1.** SNPs used to determine TGF $\beta$ 1 haplotypes in White and Latino subjects of the Multiethnic Cohort.

| SNP<br>(rs number) | Minor allele frequency |        | Gene and SNP location                  |
|--------------------|------------------------|--------|----------------------------------------|
|                    | White                  | Latino |                                        |
| rs2241714          | 0.28                   | 0.38   | MGC4093 exon 3 (Met3Ile)               |
| rs11666933         | 0.39                   | 0.43   | MGC4093 intronic                       |
| rs4803457          | 0.39                   | 0.43   | MGC4093 intronic                       |
| rs1800469          | 0.28                   | 0.39   | TGF $\beta$ 1 5'-UTR -509              |
| rs1982073          | 0.38                   | 0.43   | TGF $\beta$ 1 Exon 1 (Leu10Pro; T869C) |
| rs1800471          | 0.11                   | 0.04   | TGF $\beta$ 1 Exon 1 (Arg25Pro; G915C) |
| rs2241715          | 0.27                   | 0.41   | TGF $\beta$ 1 intronic                 |
| rs11466321         | 0.11                   | 0.03   | TGF $\beta$ 1 intronic                 |
| rs2241716          | 0.01                   | 0.02   | TGF $\beta$ 1 intronic                 |
| rs2278422          | 0.43                   | 0.37   | TGF $\beta$ 1 intronic                 |
| rs8105161          | 0.17                   | 0.15   | TGF $\beta$ 1 intronic                 |
| rs8179181          | 0.24                   | 0.15   | TGF $\beta$ 1 intronic                 |
| rs11551225         | 0.00                   | 0.01   | TGF $\beta$ 1 Exon 7 (Phe321Phe)       |
| rs2241718          | 0.19                   | 0.10   | MGC20255 intron 4                      |
| rs3810173          | 0.01                   | 0.07   | MGC20255 exon 7                        |

**TABLE E2.** Associations between TGFβ1 C-509T and rs4803457 polymorphisms, and -509T/ rs4803457T diplotypes and asthma by ethnic group.

|                                       | No Asthma |     | Lifetime asthma  |    | Early persistent asthma<br>(Diagnosis by 3 years) |    | Late onset asthma<br>(Diagnosis after 3 years) |  |
|---------------------------------------|-----------|-----|------------------|----|---------------------------------------------------|----|------------------------------------------------|--|
|                                       | N         | N   | OR (95% CI)*     | N  | OR (95% CI)*                                      | N  | OR (95% CI)*                                   |  |
| <b>Non-Hispanic whites</b>            |           |     |                  |    |                                                   |    |                                                |  |
| rs1800469 (C-509T)                    |           |     |                  |    |                                                   |    |                                                |  |
| CC                                    | 813       | 137 | 1.0 (Ref.)       | 52 | 1.0 (Ref.)                                        | 85 | 1.0 (Ref.)                                     |  |
| CT                                    | 799       | 121 | 0.89 (0.67-1.19) | 49 | 0.90 (0.58-1.40)                                  | 72 | 0.84 (0.59-1.19)                               |  |
| TT                                    | 189       | 37  | 1.23 (0.80-1.91) | 23 | 1.82 (1.03-3.23)                                  | 14 | 0.72 (0.38-1.34)                               |  |
| rs4803457 (C>T)                       |           |     |                  |    |                                                   |    |                                                |  |
| CC                                    | 646       | 116 | 1.0 (Ref.)       | 45 | 1.0 (Ref.)                                        | 71 | 1.0 (Ref.)                                     |  |
| CT                                    | 856       | 122 | 0.75 (0.55-1.01) | 50 | 0.73 (0.47-1.16)                                  | 72 | 0.70 (0.48-1.01)                               |  |
| TT                                    | 299       | 57  | 1.09 (0.75-1.60) | 29 | 1.31 (0.77-2.24)                                  | 28 | 0.84 (0.51-1.38)                               |  |
| Number of rs4803457T/-509T diplotypes |           |     |                  |    |                                                   |    |                                                |  |
| 0                                     |           |     | 1.0 (Ref.)       |    | 1.0 (Ref.)                                        |    | 1.0 (Ref.)                                     |  |
| 1                                     |           |     | 0.88 (0.66-1.17) |    | 0.89 (0.57-1.38)                                  |    | 0.83 (0.58-1.18)                               |  |
| 2                                     |           |     | 1.25 (0.81-1.94) |    | 1.85 (1.04-3.27)                                  |    | 0.73 (0.39-1.37)                               |  |
| <b>Hispanic whites</b>                |           |     |                  |    |                                                   |    |                                                |  |
| rs1800469 (C-509T)                    |           |     |                  |    |                                                   |    |                                                |  |
| CC                                    | 215       | 25  | 1.0 (Ref.)       | 10 | 1.0 (Ref.)                                        | 15 | 1.0 (Ref.)                                     |  |
| CT                                    | 411       | 60  | 1.31 (0.77-2.24) | 23 | 1.16 (0.51-2.62)                                  | 37 | 1.42 (0.73-2.77)                               |  |
| TT                                    | 188       | 28  | 1.89 (0.94-3.83) | 13 | 1.82 (0.61-5.42)                                  | 15 | 2.06 (0.85-5.01)                               |  |
| rs4803457 (C>T)                       |           |     |                  |    |                                                   |    |                                                |  |
| CC                                    | 252       | 31  | 1.0 (Ref.)       | 13 | 1.0 (Ref.)                                        | 18 | 1.0 (Ref.)                                     |  |
| CT                                    | 412       | 63  | 1.24 (0.70-2.22) | 25 | 1.03 (0.42-2.53)                                  | 38 | 1.30 (0.64-2.65)                               |  |
| TT                                    | 150       | 19  | 1.97 (1.01-3.85) | 8  | 2.11 (0.76-5.86)                                  | 11 | 1.90 (0.81-4.45)                               |  |
| Number of rs4803457T/-509T diplotypes |           |     |                  |    |                                                   |    |                                                |  |
| 0                                     |           |     | 1.0 (Ref.)       |    | 1.0 (Ref.)                                        |    | 1.0 (Ref.)                                     |  |
| 1                                     |           |     | 1.35 (0.79-2.32) |    | 1.23 (0.54-2.78)                                  |    | 1.45 (0.74-2.83)                               |  |
| 2                                     |           |     | 1.93 (0.96-3.90) |    | 1.89 (0.64-5.62)                                  |    | 2.08 (0.86-5.07)                               |  |



\* ORs adjusted for age, sex, ethnicity, atopic status, parental history of asthma, annual family income, parental education, *in utero* exposure to maternal smoking, number of smokers at home, insurance status, residential distance from nearest freeway, and community of residence.

**TABLE E3.** Effect of residential distance from nearest freeway on asthma, stratified by TGFβ1 C-509T genotypes

|                                | TGFβ1 C-509T     |                   | P-value for interaction <sup>†</sup> |
|--------------------------------|------------------|-------------------|--------------------------------------|
|                                | CC/CT            | TT                |                                      |
|                                | OR* (95% CI)     | OR* (95% CI)      |                                      |
| <b>Lifetime asthma</b>         |                  |                   |                                      |
| >1500m                         | 1.0 (Ref.)       | 1.0 (Ref.)        | 0.02                                 |
| 1001-1500m                     | 0.98 (0.64-1.50) | 0.86 (0.23-3.15)  |                                      |
| 500-1000m                      | 0.89 (0.58-1.35) | 2.65 (0.91-7.75)  |                                      |
| <500m                          | 0.89 (0.56-1.41) | 4.85 (1.36-17.32) |                                      |
| <b>Early persistent asthma</b> |                  |                   |                                      |
| >1500m                         | 1.0 (Ref.)       | 1.0 (Ref.)        | 0.18                                 |
| 1001-1500m                     | 1.73 (0.95-3.14) | 2.15 (0.37-12.46) |                                      |
| 500-1000m                      | 1.23 (0.67-2.27) | 1.45 (0.24-8.76)  |                                      |
| <500m                          | 0.88 (0.41-1.86) | 6.98 (0.98-49.64) |                                      |

\* ORs adjusted for age, sex, ethnicity, atopic status, parental history of asthma, annual family income, parental education, *in utero* exposure to maternal smoking, number of smokers at home, health insurance status, and community of residence.

<sup>†</sup> P-values for TGFβ1 C-509T by residential distance from nearest freeway were obtained from likelihood ratio test from non-stratified models with appropriate interaction terms and were based on 3df.

**TABLE E4.** Joint effects of TGF $\beta$ 1 C-509T genotypes and diplotypes and residential distance from nearest freeway on lifetime asthma in long-term residents.

|                                              | Residential distance<br>from nearest freeway | No asthma |    | Lifetime asthma       |
|----------------------------------------------|----------------------------------------------|-----------|----|-----------------------|
|                                              |                                              | N         | N  | OR (95% CI)           |
| <b>TGF<math>\beta</math>1 C-509T</b>         |                                              |           |    |                       |
| CC/CT                                        | >1500m                                       | 929       | 49 | 1.0 (Ref.)            |
| CC/CT                                        | 1001-1500m                                   | 243       | 27 | 1.06 (0.63-1.78)      |
| CC/CT                                        | 500-1000m                                    | 296       | 33 | 1.07 (0.65-1.78)      |
| CC/CT                                        | <500m                                        | 236       | 21 | 0.93 (0.52-1.67)      |
| TT                                           | >1500m                                       | 149       | 7  | 0.61 (0.27-1.40)      |
| TT                                           | 1001-1500m                                   | 37        | 2  | 0.53 (0.12-2.39)      |
| TT                                           | 500-1000m                                    | 50        | 8  | 2.18 (0.91-5.25)      |
| TT                                           | <500m                                        | 29        | 3  | 2.11 (0.57-7.76)      |
|                                              |                                              |           |    | P <sup>†</sup> = 0.12 |
| <b>Number of rs4803457T/-509T diplotypes</b> |                                              |           |    |                       |
| 0 or 1                                       | >1500m                                       |           |    | 1.0 (Ref.)            |
| 0 or 1                                       | 1001-1500m                                   |           |    | 1.06 (0.63-1.79)      |
| 0 or 1                                       | 500-1000m                                    |           |    | 1.06 (0.64-1.76)      |
| 0 or 1                                       | <500m                                        |           |    | 0.93 (0.52-1.67)      |
| 2                                            | >1500m                                       |           |    | 0.61 (0.27-1.42)      |
| 2                                            | 1001-1500m                                   |           |    | 0.53 (0.12-2.39)      |
| 2                                            | 500-1000m                                    |           |    | 2.37 (0.98-5.72)      |
| 2                                            | <500m                                        |           |    | 2.11 (0.57-7.80)      |
|                                              |                                              |           |    | P <sup>†</sup> = 0.10 |

\* ORs adjusted for age, sex, ethnicity, atopic status, parental history of asthma, annual family income, parental education, *in utero* exposure to maternal smoking, number of smokers at home, insurance status, and community of residence. Children living in Lake Arrowhead and Lompoc were excluded from the analysis. Models could not be fit for early persistent and late onset asthma phenotypes.

† P-values for TGF $\beta$ 1 C-509T and rs4803457T/-509T diplotypes by residential distance from nearest freeway were obtained from likelihood ratio tests from non-stratified models with appropriate interaction terms and were based on 3df.

**TABLE E5.** Distribution of Residential distance from a major road and traffic density\* by residential distance from nearest freeway.

|                                        | Residential distance from nearest freeway |        |            |        |           |        |       |        |
|----------------------------------------|-------------------------------------------|--------|------------|--------|-----------|--------|-------|--------|
|                                        | >1500m                                    |        | 1001-1500m |        | 500-1000m |        | <500m |        |
|                                        | N                                         | (%)    | N          | (%)    | N         | (%)    | N     | (%)    |
| Residential distance from a major road |                                           |        |            |        |           |        |       |        |
| ≥75m                                   | 990                                       | (83.5) | 240        | (77.9) | 335       | (85.0) | 207   | (68.5) |
| <75m                                   | 196                                       | (16.5) | 68         | (22.1) | 59        | (15.0) | 95    | (31.5) |
| Traffic density                        |                                           |        |            |        |           |        |       |        |
| 1 <sup>st</sup> tertile (<0.1)         | 457                                       | (36.0) | 106        | (31.6) | 138       | (32.9) | 77    | (24.5) |
| 2 <sup>nd</sup> tertile (0.1-15.5)     | 462                                       | (36.4) | 105        | (31.3) | 146       | (34.8) | 66    | (21.0) |
| 3 <sup>rd</sup> tertile (>15.5)        | 349                                       | (27.5) | 124        | (37.0) | 135       | (32.2) | 171   | (54.5) |

\* Traffic volume per square meter within 150m of residence, weighted by inverse distance from the home to each road (see methods of the online supplement for further details).

**TABLE E6.** Joint effects of TGFβ1 C-509T genotypes and other traffic measures on asthma.

| TGFβ1 C-509T                           | Traffic measures                   | Lifetime asthma<br>OR (95% CI) <sup>*</sup> | Early persistent asthma<br>OR (95% CI) <sup>*</sup> |
|----------------------------------------|------------------------------------|---------------------------------------------|-----------------------------------------------------|
| Residential distance from a major road |                                    |                                             |                                                     |
| CC/CT                                  | ≥75m                               | 1.0 (Ref.)                                  | 1.0 (Ref.)                                          |
| CC/CT                                  | <75m                               | 1.22 (0.85-1.76)                            | 0.91 (0.51-1.62)                                    |
| TT                                     | ≥75m                               | 1.37 (0.89-2.13)                            | 1.45 (0.77-2.72)                                    |
| TT                                     | <75m                               | 1.20 (0.54-2.70)                            | 2.28 (0.89-5.88)                                    |
| Traffic density <sup>†</sup>           |                                    |                                             |                                                     |
| CC/CT                                  | 1 <sup>st</sup> tertile (<0.1)     | 1.0 (Ref.)                                  | 1.0 (Ref.)                                          |
| CC/CT                                  | 2 <sup>nd</sup> tertile (0.1-15.5) | 0.93 (0.66-1.32)                            | 1.01 (0.61-1.67)                                    |
| CC/CT                                  | 3 <sup>rd</sup> tertile (>15.5)    | 0.79 (0.56-1.14)                            | 0.66 (0.38-1.17)                                    |
| TT                                     | 1 <sup>st</sup> tertile (<0.1)     | 1.76 (0.95-3.25)                            | 1.76 (0.71-4.42)                                    |
| TT                                     | 2 <sup>nd</sup> tertile (0.1-15.5) | 0.95 (0.48-1.86)                            | 1.01 (0.38-2.67)                                    |
| TT                                     | 3 <sup>rd</sup> tertile (>15.5)    | 0.85 (0.43-1.69)                            | 1.72 (0.77-3.83)                                    |

<sup>\*</sup> ORs adjusted for age, sex, ethnicity, atopic status, parental history of asthma, annual family income, parental education, *in utero* exposure to maternal smoking, number of smokers at home, health insurance status, and community of residence.

<sup>†</sup> Traffic volume per square meter within 150m of residence, weighted by inverse distance from the home to each road (see methods of the online supplement for further details).

**TABLE E7.** Effect of *in utero* exposure to maternal smoking on early persistent asthma, stratified by TGFβ1 C-509T genotypes

| <i>In utero</i> exposure to maternal smoking | TGFβ1 C-509T     |                   | <i>P</i> <sup>†</sup> |
|----------------------------------------------|------------------|-------------------|-----------------------|
|                                              | CC/CT            | TT                |                       |
|                                              | OR* (95% CI)     | OR* (95% CI)      |                       |
| No                                           | 1.0 (Ref.)       | 1.0 (Ref.)        | 0.11                  |
| Yes                                          | 0.97 (0.57-1.66) | 3.15 (0.81-12.26) |                       |

\* ORs adjusted for age, sex, ethnicity, atopic status, parental history of asthma, annual family income, parental education, *in utero* exposure to maternal smoking, number of smokers at home, health insurance status, residential distance from nearest freeway, and community of residence.

<sup>†</sup> The *P* value for the *in utero* maternal smoking by TGFβ1 C-509T interaction was obtained from likelihood ratio tests from a non-stratified model with appropriate interaction terms and was based on 1 df.

**TABLE E8.** TGFβ1 C-509T genotypes and exposure to maternal smoking *in utero* and early persistent asthma in children who had no secondhand smoke during childhood

| TGFβ1 C-509T | Exposure to<br><i>in utero</i><br>maternal smoking | No asthma | Early persistent asthma | OR* (95% CI)                 |
|--------------|----------------------------------------------------|-----------|-------------------------|------------------------------|
|              |                                                    | (N)       | (N)                     |                              |
| CC/CT        | No                                                 | 1434      | 82                      | 1.0 (Ref.)                   |
| CC/CT        | No                                                 | 98        | 9                       | 1.19 (0.54-2.63)             |
| TT           | Yes                                                | 220       | 15                      | 1.44 (0.77-2.70)             |
| TT           | Yes                                                | 13        | 4                       | 8.25 (2.22-30.63)            |
|              |                                                    |           |                         | <i>P</i> = 0.06 <sup>†</sup> |

\* ORs adjusted for age, sex, ethnicity, atopic status, parental history of asthma, annual family income, parental education, health insurance status, residential distance from nearest freeway, and community of residence.

<sup>†</sup> The *P* value for the *in utero* maternal smoking by *TGFβ1* C-509T interaction was obtained from likelihood ratio test from a non-stratified model with appropriate interaction terms and was based on 1 df.

**TABLE E9.** Joint effects TGFβ1 C-509T and residential distance from nearest freeway on lifetime asthma, stratified by *in utero* exposure to maternal smoking.

| TGFβ1<br>C-509T | Residential distance from<br>nearest freeway | <i>In utero</i> maternal smoking |                  |
|-----------------|----------------------------------------------|----------------------------------|------------------|
|                 |                                              | Yes                              | No               |
|                 |                                              | OR* (95% CI)                     | OR* (95% CI)     |
| CC/CT           | >1500m                                       | 1.0 (Ref.)                       | 1.0 (Ref.)       |
| CC/CT           | 1001-1500m                                   | 1.61 (0.54-4.85)                 | 0.94 (0.59-1.50) |
| CC/CT           | 500-1000m                                    | 1.47 (0.47-4.63)                 | 0.76 (0.48-1.21) |
| CC/CT           | <500m                                        | 1.50 (0.47-4.78)                 | 0.81 (0.48-1.38) |
| TT              | >1500m                                       | -                                | 0.89 (0.48-1.65) |
| TT              | 1001-1500m                                   | 10.04 (1.05-95.92)               | 0.51 (0.16-1.69) |
| TT              | 500-1000m                                    | 2.57 (0.28-23.52)                | 1.89 (0.89-4.02) |
| TT              | <500m                                        | 10.02 (1.25-80.40)               | 1.96 (0.67-5.71) |

\* ORs adjusted for age, sex, ethnicity, atopic status, parental history of asthma, annual family income, parental education, number of smokers at home, health insurance status, and community of residence.



**TABLE E10.** Association between TGFβ1 C-509T genotype and asthma, stratified by history of atopy.

| TGFβ1<br>C-509T | History of atopy    |                               |                         |                     |                               |                         |
|-----------------|---------------------|-------------------------------|-------------------------|---------------------|-------------------------------|-------------------------|
|                 | No                  |                               |                         | Yes                 |                               |                         |
|                 | Lifetime<br>asthma  | Early<br>persistent<br>asthma | Late<br>onset<br>asthma | Lifetime<br>asthma  | Early<br>persistent<br>asthma | Late<br>onset<br>asthma |
|                 | OR*<br>(95% CI)     | OR*<br>(95% CI)               | OR*<br>(95% CI)         | OR*<br>(95% CI)     | OR*<br>(95% CI)               | OR*<br>(95% CI)         |
| CC              | 1.0 (Ref.)          | 1.0 (Ref.)                    | 1.0 (Ref.)              | 1.0 (Ref.)          | 1.0 (Ref.)                    | 1.0 (Ref.)              |
| CT              | 0.98<br>(0.62-1.57) | 1.25<br>(0.57-2.72)           | 0.91<br>(0.51-1.61)     | 1.02<br>(0.74-1.42) | 1.08<br>(0.67-1.74)           | 0.98<br>(0.66-1.47)     |
| TT              | 1.20<br>(0.62-2.32) | 2.37<br>(0.94-5.94)           | 0.66<br>(0.24-1.80)     | 1.44<br>(0.89-2.34) | 1.52<br>(0.77-2.97)           | 1.31<br>(0.71-2.42)     |

\* ORs adjusted for age, sex, ethnicity, atopic status, parental history of asthma, annual family income, parental education, number of smokers at home, health insurance status, and community of residence.

**TABLE E11.** Comparison between children who provided buccal samples and those who did not participate in the genetic study.

|                                              | Participants<br>(N =3,153) |        | Non-participants<br>(N = 1,840) |                     |
|----------------------------------------------|----------------------------|--------|---------------------------------|---------------------|
|                                              | N*                         | (%)    | N*                              | (%)                 |
| Sex                                          |                            |        |                                 |                     |
| Girls                                        | 1688                       | (53.5) | 886                             | (48.2)              |
| Boys                                         | 1465                       | (46.5) | 954                             | (51.8)              |
| Age (years)                                  |                            |        |                                 |                     |
| ≤ 10                                         | 1730                       | (54.9) | 718                             | (39.0)              |
| 11-12                                        | 593                        | (18.8) | 382                             | (20.8)              |
| > 12                                         | 830                        | (26.3) | 740                             | (40.2)              |
| Ethnicity                                    |                            |        |                                 |                     |
| Non-Hispanic white                           | 2172                       | (68.9) | 1137                            | (61.8)              |
| Hispanic white                               | 981                        | (31.1) | 703                             | (38.2)              |
| Annual family income (\$)                    |                            |        |                                 |                     |
| < \$15,500                                   | 372                        | (13.7) | 346                             | (23.1)              |
| \$15,000 - \$49,999                          | 1144                       | (42.0) | 658                             | (44.0)              |
| ≥\$50,000                                    | 1205                       | (44.3) | 492                             | (32.9)              |
| Parent/guardian education                    |                            |        |                                 |                     |
| < 12 <sup>th</sup> grade                     | 362                        | (11.8) | 362                             | (20.3)              |
| 12 <sup>th</sup> grade                       | 595                        | (19.4) | 424                             | (23.7)              |
| Some college                                 | 1404                       | (45.7) | 732                             | (41.0)              |
| College                                      | 314                        | (10.2) | 121                             | (6.8)               |
| Some graduate                                | 397                        | (12.9) | 146                             | (8.2)               |
| Health insurance coverage                    |                            |        |                                 |                     |
| No                                           | 444                        | (14.3) | 338                             | (18.9) <sup>†</sup> |
| Yes                                          | 2660                       | (85.7) | 1453                            | (81.1)              |
| Exposure to maternal smoking <i>in utero</i> |                            |        |                                 |                     |
| No                                           | 2553                       | (82.6) | 1366                            | (76.9)              |
| Yes                                          | 537                        | (17.4) | 411                             | (23.1)              |
| Number of smokers at home                    |                            |        |                                 |                     |
| None                                         | 2153                       | (70.6) | 1035                            | (58.9)              |
| 1                                            | 598                        | (19.6) | 458                             | (26.1)              |
| 2 or more                                    | 298                        | (9.8)  | 264                             | (15.0)              |
| Residential distance from nearest freeway    |                            |        |                                 |                     |
| >1500m                                       | 1580                       | (58.6) | 806                             | (52.8)              |
| 1001-1500m                                   | 351                        | (13.0) | 236                             | (15.5)              |
| 500-1000m                                    | 437                        | (16.2) | 259                             | (17.0)              |
| <500m                                        | 327                        | (12.1) | 226                             | (14.8)              |
| Asthma                                       |                            |        |                                 |                     |
| Never                                        | 2726                       | (86.5) | 1632                            | (88.7)              |
| Ever                                         | 427                        | (13.5) | 208                             | (11.3)              |

\*Numbers always do not add up because of missing data. Comparisons were restricted to non-Hispanic and Hispanic white children. Children who had early transient asthma and those with unknown asthma status have been excluded from these comparisons to reflect the population studied.

**TABLE E12.** Distribution of annual family income and parental education by residential distance from nearest freeway

|                                  | Residential distance from nearest freeway |        |            |        |           |        |       |        |
|----------------------------------|-------------------------------------------|--------|------------|--------|-----------|--------|-------|--------|
|                                  | >1500m                                    |        | 1001-1500m |        | 500-1000m |        | <500m |        |
|                                  | N                                         | (%)    | N          | (%)    | N         | (%)    | N     | (%)    |
| <b>Annual family income (\$)</b> |                                           |        |            |        |           |        |       |        |
| < \$15,500                       | 147                                       | (13.6) | 32         | (10.7) | 53        | (14.4) | 42    | (16.4) |
| \$15,000 - \$49,999              | 385                                       | (35.5) | 122        | (40.9) | 167       | (45.4) | 143   | (55.9) |
| ≥\$50,000                        | 552                                       | (50.9) | 144        | (48.3) | 148       | (40.2) | 71    | (27.7) |
| <b>Parent education</b>          |                                           |        |            |        |           |        |       |        |
| < 12 <sup>th</sup> grade         | 161                                       | (13.0) | 33         | (10.1) | 43        | (10.7) | 51    | (16.6) |
| 12 <sup>th</sup> grade           | 228                                       | (18.5) | 70         | (21.4) | 85        | (21.2) | 72    | (23.4) |
| Some college                     | 529                                       | (42.9) | 152        | (46.5) | 191       | (47.6) | 138   | (44.8) |
| College                          | 149                                       | (12.1) | 29         | (8.9)  | 33        | (8.2)  | 16    | (5.2)  |
| Some graduate                    | 167                                       | (13.5) | 43         | (13.1) | 49        | (12.2) | 31    | (10.0) |

**TABLE E13.** Distribution of TGF $\beta$ 1 genotypes and residential distance from nearest freeway in two 4<sup>th</sup> grade students recruited in 1993 and 1996

|                                           | 4 <sup>th</sup> grade students<br>in 1993 |        | 4 <sup>th</sup> grade students<br>in 1996 |        |
|-------------------------------------------|-------------------------------------------|--------|-------------------------------------------|--------|
|                                           | N                                         | (%)    | N                                         | (%)    |
| rs1800469 (C-509T)                        |                                           |        |                                           |        |
| CC                                        | 432                                       | (40.3) | 479                                       | (41.7) |
| CT                                        | 504                                       | (47.1) | 499                                       | (43.5) |
| TT                                        | 135                                       | (12.6) | 170                                       | (14.8) |
| rs4803457 (C>T)                           |                                           |        |                                           |        |
| CC                                        | 348                                       | (32.5) | 389                                       | (33.9) |
| CT                                        | 532                                       | (49.7) | 526                                       | (45.8) |
| TT                                        | 191                                       | (17.8) | 233                                       | (20.3) |
| Residential distance from nearest freeway |                                           |        |                                           |        |
| >1500m                                    | 570                                       | (62.6) | 581                                       | (58.0) |
| 1001-1500m                                | 106                                       | (11.6) | 126                                       | (12.6) |
| 500-1000m                                 | 147                                       | (16.1) | 165                                       | (16.5) |
| <500m                                     | 88                                        | (9.7)  | 129                                       | (12.9) |

**TABLE E14.** Associations between TGF $\beta$ 1 C-509T and rs4803457 polymorphisms, and rs4803457T/-509T diplotypes and asthma in two different 4<sup>th</sup> grade children recruited in 1993 and 1996

|                                                      | Lifetime asthma                           |                                           | Early persistent asthma<br>(Diagnosis by 3 years) |                                           | Late onset asthma<br>(Diagnosis after 3 years) |                                           |
|------------------------------------------------------|-------------------------------------------|-------------------------------------------|---------------------------------------------------|-------------------------------------------|------------------------------------------------|-------------------------------------------|
|                                                      | 4 <sup>th</sup> grade students<br>in 1993 | 4 <sup>th</sup> grade students<br>in 1996 | 4 <sup>th</sup> grade<br>students in 1993         | 4 <sup>th</sup> grade<br>students in 1996 | 4 <sup>th</sup> grade<br>students in 1993      | 4 <sup>th</sup> grade<br>students in 1996 |
|                                                      | OR (95% CI) *                             | OR (95% CI) *                             | OR (95% CI) *                                     | OR (95% CI) *                             | OR (95% CI) *                                  | OR (95% CI) *                             |
| <b>rs1800469 (C-509T)</b>                            |                                           |                                           |                                                   |                                           |                                                |                                           |
| CC                                                   | 1.0 (Ref.)                                | 1.0 (Ref.)                                | 1.0 (Ref.)                                        | 1.0 (Ref.)                                | 1.0 (Ref.)                                     | 1.0 (Ref.)                                |
| CT                                                   | 1.59 (0.99-2.55)                          | 0.95 (0.63-1.43)                          | 1.13 (0.56-2.30)                                  | 1.15 (0.64-2.05)                          | 2.25 (1.23-4.15)                               | 0.71 (0.41-1.22)                          |
| TT                                                   | 2.02 (1.04-3.94)                          | 1.84 (1.07-3.17)                          | 3.14 (1.33-7.40)                                  | 2.33 (1.10-4.95)                          | 0.90 (0.29-2.72)                               | 1.41 (0.70-2.87)                          |
| <b>rs4803457 (C&gt;T)</b>                            |                                           |                                           |                                                   |                                           |                                                |                                           |
| CC                                                   | 1.0 (Ref.)                                | 1.0 (Ref.)                                | 1.0 (Ref.)                                        | 1.0 (Ref.)                                | 1.0 (Ref.)                                     | 1.0 (Ref.)                                |
| CT                                                   | 1.09 (0.67-1.78)                          | 0.76 (0.50-1.16)                          | 0.77 (0.37-1.61)                                  | 0.82 (0.45-1.51)                          | 1.40 (0.75-2.62)                               | 0.62 (0.36-1.09)                          |
| TT                                                   | 1.67 (0.91-3.07)                          | 1.29 (0.78-2.15)                          | 2.28 (0.99-5.21)                                  | 1.49 (0.74-3.01)                          | 1.17 (0.50-2.75)                               | 1.05 (0.53-2.06)                          |
| <b>Number of<br/>rs4803457T/-509T<br/>diplotypes</b> |                                           |                                           |                                                   |                                           |                                                |                                           |
| 0                                                    | 1.0 (Ref.)                                | 1.0 (Ref.)                                | 1.0 (Ref.)                                        | 1.0 (Ref.)                                | 1.0 (Ref.)                                     | 1.0 (Ref.)                                |
| 1                                                    | 1.46 (0.91-2.34)                          | 0.97 (0.64-1.47)                          | 1.02 (0.50-2.07)                                  | 1.16 (0.65-2.07)                          | 2.12 (1.16-3.87)                               | 0.74 (0.43-1.26)                          |
| 2                                                    | 1.93 (1.00-3.75)                          | 1.93 (1.12-3.32)                          | 2.97 (1.27-6.94)                                  | 2.45 (1.15-5.21)                          | 0.86 (0.28-2.60)                               | 1.47 (0.73-2.99)                          |

\* ORs adjusted for age, sex, ethnicity, atopic status, parental history of asthma, annual family income, parental education, *in utero* exposure to maternal smoking, number of smokers at home, health insurance status, residential distance from nearest freeway, and community of residence.

**TABLE E15.** Joint effects of TGFβ1 C-509T genotypes and rs4803457T/-509T diplotypes and residential distance from nearest freeway on asthma in two different 4<sup>th</sup> grade children recruited in 1993 and 1996

|                       | Residential distance from nearest freeway | Lifetime asthma                        |                                        | Early persistent asthma                |                                        |
|-----------------------|-------------------------------------------|----------------------------------------|----------------------------------------|----------------------------------------|----------------------------------------|
|                       |                                           | 4 <sup>th</sup> grade students in 1993 | 4 <sup>th</sup> grade students in 1996 | 4 <sup>th</sup> grade students in 1993 | 4 <sup>th</sup> grade students in 1996 |
|                       |                                           | OR (95% CI)*                           | OR (95% CI)*                           | OR (95% CI)*                           | OR (95% CI)*                           |
| <b>TGFβ1 C-509T</b>   |                                           |                                        |                                        |                                        |                                        |
| CC/CT                 | >1500m                                    | 1.0 (Ref.)                             | 1.0 (Ref.)                             | 1.0 (Ref.)                             | 1.0 (Ref.)                             |
| CC/CT                 | 1001-1500m                                | 1.52 (0.69-3.36)                       | 1.21 (0.59-2.49)                       | 2.81 (0.88-8.96)                       | 1.79 (0.69-4.61)                       |
| CC/CT                 | 500-1000m                                 | 0.58 (0.26-1.30)                       | 1.37 (0.69-2.73)                       | 0.82 (0.26-2.58)                       | 1.41 (0.55-3.64)                       |
| CC/CT                 | <500m                                     | 1.20 (0.47-3.09)                       | 0.98 (0.44-2.15)                       | 0.44 (0.05-4.28)                       | 0.95 (0.32-2.87)                       |
| TT                    | >1500m                                    | 0.71 (0.25-1.99)                       | 1.15 (0.46-2.91)                       | 2.14 (0.62-7.38)                       | 0.94 (0.19-4.65)                       |
| TT                    | 1001-1500m                                | 1.75 (0.37-8.32)                       | 0.96 (0.21-4.46)                       | 4.22 (0.73-24.41)                      | 2.76 (0.51-14.84)                      |
| TT                    | 500-1000m                                 | 4.33 (1.27-14.75)                      | 2.51 (0.83-7.57)                       | 6.62 (1.17-37.30)                      | 2.15 (0.43-10.65)                      |
| TT                    | <500m                                     | -                                      | 6.43 (1.97-20.97)                      | -                                      | 9.17 (2.16-38.93)                      |
| <b>#TT diplotypes</b> |                                           |                                        |                                        |                                        |                                        |
| 0 or 1                | >1500m                                    | 1.0 (Ref.)                             | 1.0 (Ref.)                             | 1.0 (Ref.)                             | 1.0 (Ref.)                             |
| 0 or 1                | 1001-1500m                                | 1.52 (0.69-3.37)                       | 1.22 (0.59-2.50)                       | 2.81 (0.88-8.95)                       | 1.80 (0.70-4.64)                       |
| 0 or 1                | 500-1000m                                 | 0.58 (0.26-1.31)                       | 1.35 (0.68-2.68)                       | 0.82 (0.26-2.58)                       | 1.39 (0.54-3.59)                       |
| 0 or 1                | <500m                                     | 1.20 (0.47-3.09)                       | 0.98 (0.44-2.16)                       | 0.44 (0.05-4.28)                       | 0.96 (0.32-2.89)                       |
| 2                     | >1500m                                    | 0.72 (0.26-2.01)                       | 1.17 (0.46-2.95)                       | 2.15 (0.62-7.40)                       | 0.95 (0.19-4.72)                       |
| 2                     | 1001-1500m                                | 1.75 (0.37-8.33)                       | 0.96 (0.21-4.48)                       | 4.21 (0.73-24.40)                      | 2.79 (0.52-15.00)                      |
| 2                     | 500-1000m                                 | 4.34 (1.28-14.77)                      | 2.86 (0.93-8.75)                       | 6.62 (1.17-37.30)                      | 2.54 (0.50-13.01)                      |
| 2                     | <500m                                     | -                                      | 6.48 (1.99-21.18)                      | -                                      | 9.31 (2.19-39.64)                      |

\* ORs adjusted for age, sex, ethnicity, atopic status, parental history of asthma, annual family income, parental education, *in utero* exposure to maternal smoking, number of smokers at home, health insurance status, and community of residence.

† P-values for TGFβ1 C-509T by residential distance from nearest freeway for lifetime asthma was statistically significant (P = 0.02)

**TABLE E16.** TGFβ1 C-509T genotypes and rs4803457T/-509T diplotypes and *in utero* exposure to maternal smoking and early persistent asthma in two different 4<sup>th</sup> grade children recruited in 1993 and 1996

|                                     |     | Early persistent asthma       |                               |
|-------------------------------------|-----|-------------------------------|-------------------------------|
| <i>In utero</i><br>maternal smoking |     | 4 <sup>th</sup> grade in 1993 | 4 <sup>th</sup> grade in 1996 |
|                                     |     | OR (95% CI) *                 | OR (95% CI) *                 |
| <b>rs1800469 (C-509T)</b>           |     |                               |                               |
| CC/CT                               | No  | 1.0                           | 1.0                           |
| TT                                  | No  | 2.41 (1.01-5.73)              | 1.84 (0.83-4.06)              |
| CC/CT                               | Yes | 1.04 (0.39-2.74)              | 0.68 (0.29-1.59)              |
| TT                                  | Yes | 6.21 (1.48-26.01)             | 2.57 (0.74-9.01)              |
| <b>#TT diplotypes</b>               |     |                               |                               |
| 0 or 1                              | No  | 1.0                           | 1.0                           |
| 2                                   | No  | 2.41 (1.01-5.73)              | 1.94 (0.87-4.31)              |
| 0 or 1                              | Yes | 1.04 (0.40-2.74)              | 0.68 (0.29-1.59)              |
| 2                                   | Yes | 6.30 (1.50-26.53)             | 2.59 (0.74-9.07)              |

\* ORs adjusted for age, sex, ethnicity, atopic status, parental history of asthma, annual family income, parental education, *in utero* exposure to maternal smoking, number of smokers at home, health insurance status, residential distance from nearest freeway, and community of residence.



**TABLE E17.** Odds ratios (ORs) and p-values for covariates from the model that tested the modifying effects of traffic distance on lifetime asthma (Table 4 of the manuscript)

| Covariate                   | OR* (95% CI)     | P-value | Covariate                            | OR* (95% CI)     | P-value |
|-----------------------------|------------------|---------|--------------------------------------|------------------|---------|
| Age (yrs)                   |                  |         | Exposed in utero to maternal smoking | 0.88 (0.60-1.29) | 0.51    |
| ≤ 10                        | 1.0 (Ref.)       | 0.12    |                                      |                  |         |
| 11-12                       | 1.03 (0.71-1.47) |         | Health insurance (yes)               | 1.69 (1.06-2.71) | 0.03    |
| > 12                        | 1.37 (1.01-1.84) |         |                                      |                  |         |
| Sex (boys)                  | 1.58 (1.22-2.04) | 0.0006  | Parental education                   |                  |         |
| Ethnicity (Hispanic white)  | 1.08 (0.79-1.47) | 0.64    | < 12th grade                         | 1.0 (Ref.)       | 0.30    |
| Child's atopic status (yes) | 5.16 (3.91-6.80) |         | 12th grade                           | 1.53 (0.88-2.67) |         |
| Parental asthma (yes)       | 3.05 (2.31-4.02) | <0.0001 | Some college                         | 1.32 (0.78-2.25) |         |
| Annual family income (\$)   |                  |         | College                              | 1.11 (0.58-2.15) |         |
| < \$15,500                  | 1.0 (Ref.)       | 0.34    | Some graduate                        | 0.98 (0.51-1.88) |         |
| \$15,000 - \$49,999         | 0.88 (0.55-1.40) |         | Community                            |                  |         |
| ≥\$50,000                   | 1.11 (0.69-1.79) |         | Alpine                               | 1.0 (Ref.)       | 0.32    |
| Numbers of smokers at home  |                  |         | Upland                               | 0.96 (0.54-1.70) |         |
| None                        | 1.0 (Ref.)       | 0.21    | Santa Maria                          | 0.88 (0.48-1.63) |         |
| One                         | 1.21 (0.85-1.71) |         | Atascadero                           | 1.50 (0.89-2.53) |         |
| Two or more                 | 1.49 (0.93-2.39) |         | San Dimas                            | 0.81 (0.45-1.46) |         |
|                             |                  |         | Riverside                            | 0.77 (0.42-1.42) |         |
|                             |                  |         | Miraloma                             | 0.94 (0.53-1.67) |         |
|                             |                  |         | Long Beach                           | 0.74 (0.39-1.39) |         |
|                             |                  |         | Lancaster                            | 0.79 (0.44-1.42) |         |
|                             |                  |         | Lake Elsinore                        | 0.82 (0.46-1.46) |         |

\*ORs are mutually adjusted for all variable presented and the interaction variable for TGFβ1 C-509T genotype and residential

distance from nearest freeway, which have been presented in Table 4 of the manuscript.

## References

- E1. Peters JM, Avol E, Navidi W, London SJ, Gauderman WJ, Lurmann F, Linn WS, Margolis H, Rappaport E, Gong H, et al. A study of twelve Southern California communities with differing levels and types of air pollution. I. Prevalence of respiratory morbidity. *Am J Respir Crit Care Med* 1999; 159(3):760-7.
- E2. Peters JM, Avol E, Gauderman WJ, Linn WS, Navidi W, London SJ, Margolis H, Rappaport E, Vora H, Gong H, Jr., et al. A study of twelve Southern California communities with differing levels and types of air pollution. II. Effects on pulmonary function. *Am J Respir Crit Care Med* 1999; 159(3):768-75.
- E3. Wu J, Lurmann F, Winer A, Lu R, Turco R, and Funk T. Development of an individual exposure model for application to the Southern California children's health study. *Atmospheric Environment* 2005; 39(2):259-273.
- E4. Kolonel LN, Henderson BE, Hankin JH, Nomura AMY, Wilkens LR, Pike MC, Stram DO, Monroe KR, Earle ME, and Nagamine FS. A Multiethnic Cohort in Hawaii and Los Angeles: Baseline Characteristics. *Am. J. Epidemiol.* 2000; 151(4):346-357.
- E5. Gabriel SB, Schaffner SF, Nguyen H, Moore JM, Roy J, Blumenstiel B, Higgins J, DeFelice M, Lochner A, Faggart M, et al. The structure of haplotype blocks in the human genome. *Science* 2002; 296(5576):2225-9.
